# Supplementary material for: Nonstoichiometry Defects in Double Oxides of the A2BO4-Type
Source: MDPI journal article supplement (doi:10.3390/ma15217642), 2022-10-31
Supplement: s1 [file s1]

## Supplementary

This file contains:

One figure:

**Figure S1:** Experimental and model (according to the results of refinement by the Rietveld method) diffraction patterns: (a) Sample 1; (b) Sample 2.

Three tables:

**Table S1:** Structural parameters obtained from GSAS-II. Space group of symmetry I4/mmm.

**Table S2:** Positions of diffraction peaks for sample 1 calculated from the results of modeling by the Rietveld method (average lattice parameters) and by the method of modeling diffraction patterns for one-dimensionally disordered structures ( $\delta = 0$ )

**Table S3:** Optimized Model Parameters for Samples 1 and 2

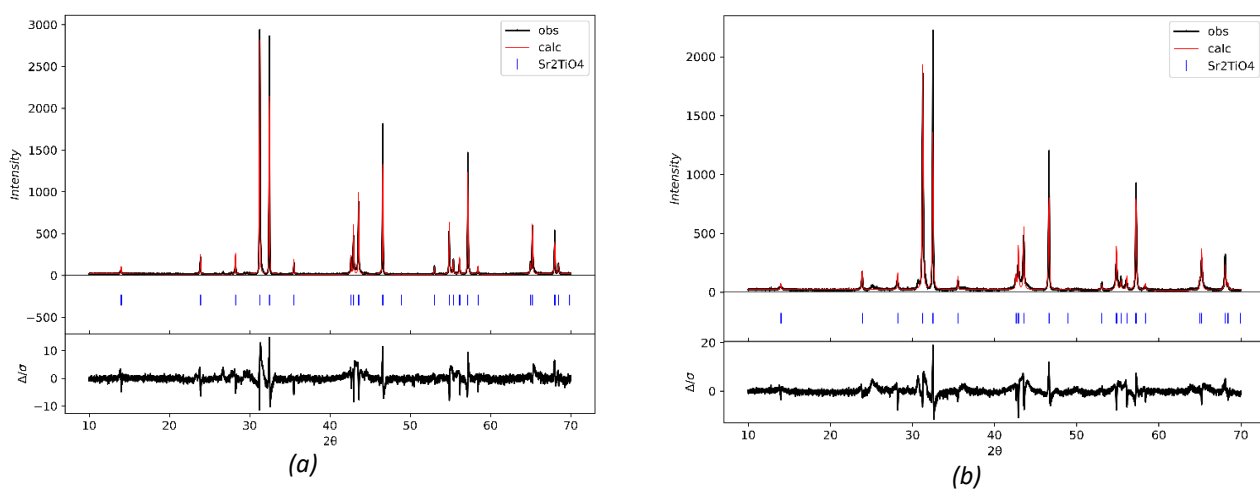

Figure S1. Experimental and model (according to the results of refinement by the Rietveld method) diffraction patterns: (a) Sample 1; (b) Sample 2.

Table S1. Structural parameters obtained from GSAS-II. Space group of symmetry I4/mmm.

| Sample 1           |                 |     |         | Sample 2       |         |     |         |
|--------------------|-----------------|-----|---------|----------------|---------|-----|---------|
| a (Å)              | 3.8860(0.0003)  |     |         | 3.8823(0.0002) |         |     |         |
| c (Å)              | 12.5910(0.0008) |     |         | 12.6059(0.002) |         |     |         |
| Coordinates        |                 |     |         |                |         |     |         |
| Atom               | x               | y   | z       | Atom           | x       | y   | z       |
| Sr                 | 0               | 0   | 0.35320 | Sr             | 0       | 0   | 0.35216 |
| Ti                 | 0.5             | 0.5 | 0.5     | Ti             | 0.5     | 0.5 | 0.5     |
| O1                 | 0.5             | 0   | 0.5     | O1             | 0.5     | 0   | 0.5     |
| O2                 | 0               | 0   | 0.15728 | O2             | 0       | 0   | 0.15873 |
| Thermal parameters |                 |     |         |                |         |     |         |
| Atom               | U               |     |         | U              |         |     |         |
| Sr                 | 0.00523         |     |         | Sr             | 0.01538 |     |         |
| Ti                 | 0.00005         |     |         | Ti             | 0.00005 |     |         |
| O1                 | 0.01222         |     |         | O1             | 0.02015 |     |         |
| O2                 | 0.01105         |     |         | O2             | 0.05182 |     |         |
| R (%)              | 20.12           |     |         | 21.02          |         |     |         |

Table S2. Positions of diffraction peaks for sample 1 calculated from the results of modeling by the Rietveld method (average lattice parameters) and by the method of modeling diffraction patterns for one-dimensionally disordered structures ( $\delta = 0$ )

| h | k | l | 2 $\Theta$ (°) |                 |                | $\Delta(2\Theta)$ (°)<br>(Experiment - Rietveld Model) | $\Delta(2\Theta)$ (°)<br>(Experiment - Defect Model) |
|---|---|---|----------------|-----------------|----------------|--------------------------------------------------------|------------------------------------------------------|
|   |   |   | Experiment     | Optimized Model | Rietveld Model |                                                        |                                                      |
| 1 | 0 | 1 | 23.86          | 23.88           | 23.89          | -0.02                                                  | -0.01                                                |
| 0 | 0 | 4 | 28.24          | 28.23           | 28.26          | -0.02                                                  | 0.00                                                 |
| 1 | 0 | 3 | 31.27          | 31.27           | 31.27          | 0.00                                                   | 0.00                                                 |
| 1 | 1 | 0 | 32.46          | 32.47           | 32.48          | -0.02                                                  | -0.01                                                |
| 1 | 1 | 2 | 35.53          | 35.53           | 35.53          | -0.01                                                  | -0.01                                                |
| 0 | 0 | 6 | 42.95          | 42.96           | 42.96          | -0.01                                                  | -0.01                                                |
| 1 | 1 | 4 | 43.57          | 43.56           | 43.58          | -0.02                                                  | 0.01                                                 |
| 2 | 0 | 0 | 46.58          | 46.59           | 46.59          | -0.01                                                  | -0.01                                                |
| 2 | 1 | 1 | 53.01          | 53.01           | 53.02          | -0.01                                                  | 0.00                                                 |
| 1 | 1 | 6 | 54.87          | 54.87           | 54.87          | 0.00                                                   | 0.00                                                 |
| 2 | 0 | 4 | 55.38          | 55.37           | 55.39          | -0.01                                                  | 0.01                                                 |
| 1 | 0 | 7 | 56.15          | 56.14           | 56.17          | -0.02                                                  | 0.00                                                 |
| 2 | 1 | 3 | 57.19          | 57.18           | 57.19          | 0.01                                                   | 0.01                                                 |
| 2 | 0 | 6 | 65.23          | 65.23           | 65.23          | 0.00                                                   | 0.00                                                 |
| 2 | 2 | 0 | 68.01          | 68.01           | 68.02          | -0.01                                                  | 0.00                                                 |

Table S3. Optimized Model Parameters for Samples 1 and 2

|                                   |          |          |     |
|-----------------------------------|----------|----------|-----|
|                                   | Sample 1 | Sample 2 |     |
| Lattice parameters (Å)            |          |          |     |
| a =                               | 3.8866   | 3.8826   |     |
| c =                               | 12.5961  | 12.6176  |     |
| Layer A                           |          |          |     |
| Layer thickness (Å)               | 3.6755   | 3.7633   |     |
| Coordinates                       |          |          |     |
| Atom                              | x        | y        | z   |
| Sr                                | 0        | 0        | 0   |
| Ti                                | 0.5      | 0.5      | 0.5 |
| O1                                | 0        | 0.5      | 0.5 |
| O2                                | 0.5      | 0        | 0.5 |
| O3                                | 0.5      | 0.5      | 0   |
| Layer B                           |          |          |     |
| Layer thickness (Å)               | 2.6225   | 2.5455   |     |
| Coordinates                       |          |          |     |
| Atom                              | x        | y        | z   |
| Sr                                | 0        | 0        | 0   |
| O                                 | 0.5      | 0.5      | 0   |
| Particle size (Å), cylinder shape |          |          |     |
| Height                            | 865      | 490      |     |
| Diameter                          | 1100     | 865      |     |
